# Supplementary material for: Oxidized multiwall carbon nanotube modified separator for high performance lithium–sulfur batteries with high sulfur loading
Source: Royal Society of Chemistry journal article supplement (doi:10.1039/c6ra14581g), 2016-01-01
Supplement: c6ra14581g1.pdf [file c6ra14581g1.pdf]

## Supporting Information

# Oxidized Multiwall Carbon Nanotube Modified Separator for High Performance Lithium-Sulfur Batteries with High Sulfur Loading

Xing Cheng,<sup>ab</sup> Weikun Wang,<sup>b\*</sup> Anbang Wang,<sup>b</sup> Keguo Yuan,<sup>b</sup> Zhaoqing Jin,<sup>b</sup> Yusheng Yang,<sup>b</sup> and Xiuying Zhao<sup>a\*</sup>

a Department of Material Science and Engineering, Beijing University of Chemical Technology, Beijing 100029, China. E-mail: zhaoxy@mail.buct.edu.cn;

b Military Power Sources Research and Development Center, Research Institute of Chemical Defense, Beijing 100191, China. Fax: +86-10-66748499; Tel: +86-10-66705840; E-mail: wangweikun2002@163.com.

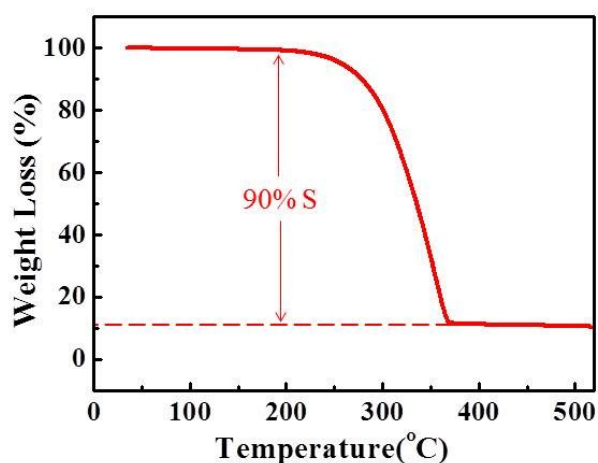

**Figure S1.** TGA curves of sulfur composite materials from 30 °C to 500 °C at a heating rate of 10 °C min<sup>-1</sup> under N<sub>2</sub> atmosphere.

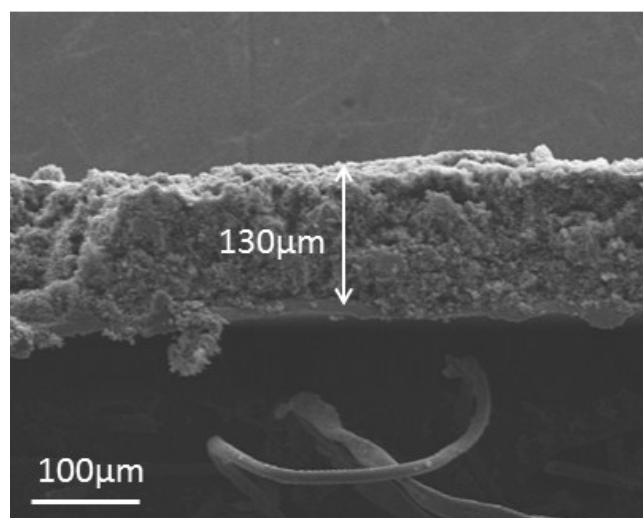

**Figure S2.** Cross sectional SEM image of the cathode

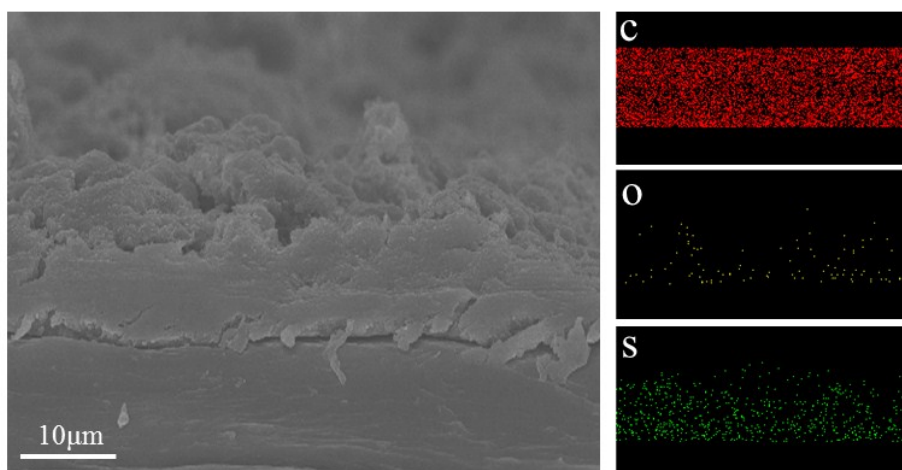

**Figure S3.** Cross sectional SEM observation and elemental mappings of the cycled o-MWCNT-coated separator.

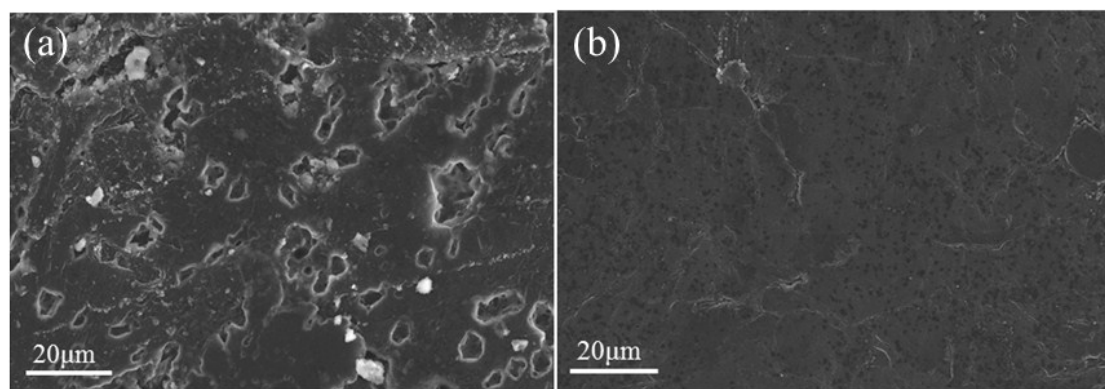

**Figure S4.** SEM images of the cycled Li foil in the cells utilizing (a) pristine separator and (b) o-MWCNT-coated separator.
